# Supplementary material for: Atomically dispersed Ru supported on microporous CoO ultrathin nanosheets synthesized by melamine induction for a highly efficient oxygen evolution reaction
Source: Royal Society of Chemistry journal article supplement (doi:10.1039/d3tc00825h), 2023-01-01
Supplement: d3tc00825h1.pdf [file d3tc00825h1.pdf]

## **Supplementary Material**

### **Atomic Dispersed Ru Supported on Microporous CoO Ultrathin Nanosheets Synthesized by Melamine Induction for Highly Efficient Oxygen Evolution Reaction**

*Dong Guo, <sup>a, b</sup> Chen Chen, <sup>a</sup> Yongqiang Wang, <sup>a</sup> Youke Wang <sup>b</sup> and Conglu Zhang <sup>\*a</sup>*

a. School of Pharmaceutical Engineering, Shenyang Pharmaceutical University, Benxi,  
Liaoning Province 117004, PR China

b. State Key Laboratory of Water Environment Simulation, Ministry of Education, School  
of Environment, Beijing Normal University, Beijing, 100875, PR China

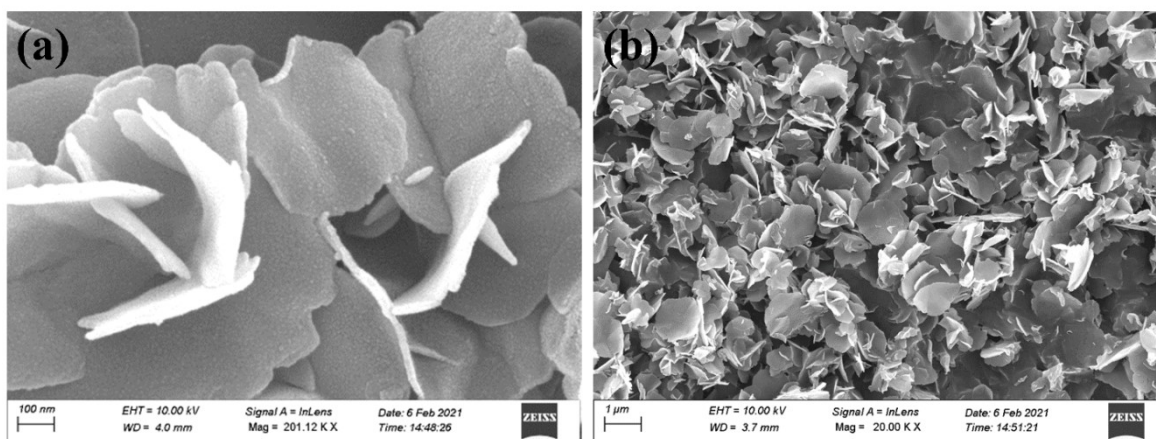

**Fig. S1.** (a), (b) SEM image of CoO/Ru HPNs.

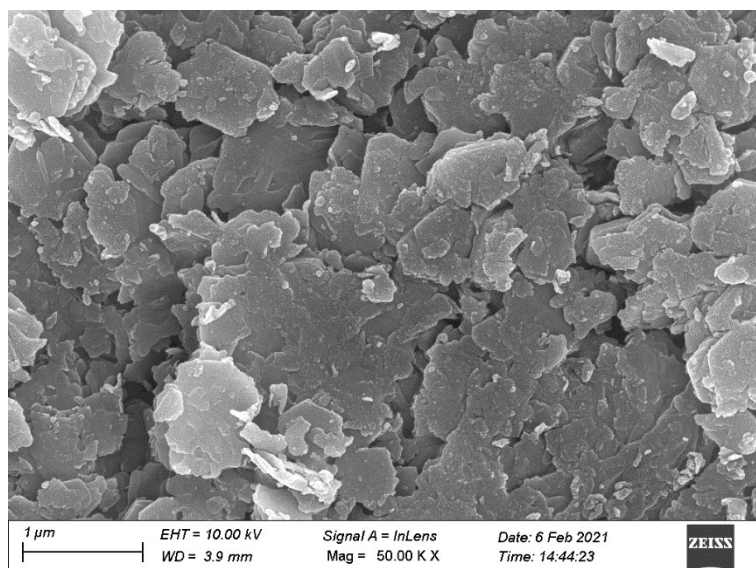

**Fig. S2.** SEM image of CoO/Ru HPNs calcined at 625°C.

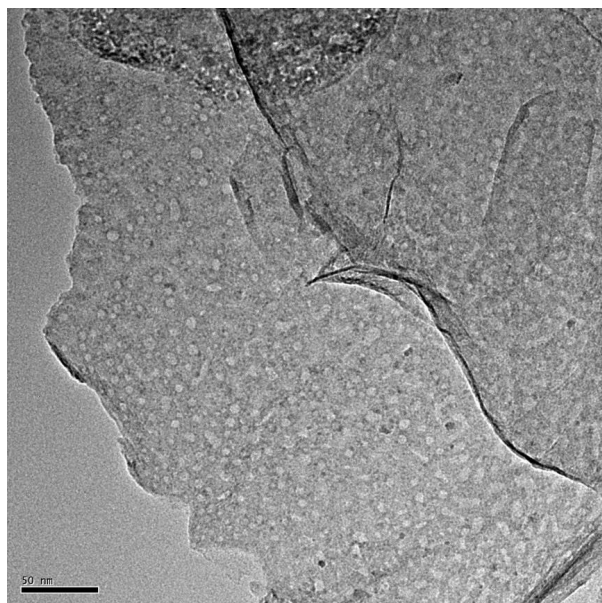

**Fig. S3.** TEM image of CoO/Ru HPNs.

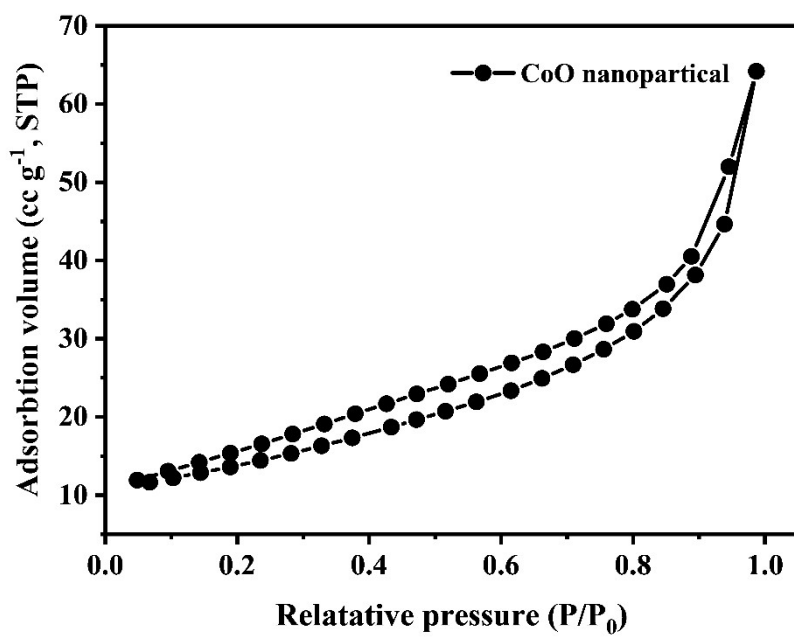

**Fig. S4.** BET results of CoO nanoparticles.

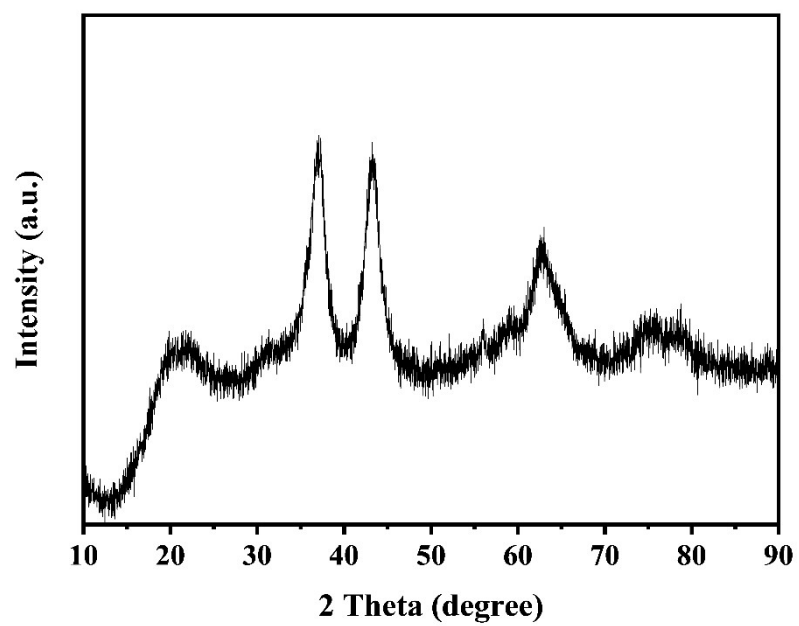

**Fig. S5.** CoO/Ru HPNs calcined at 425 °C.

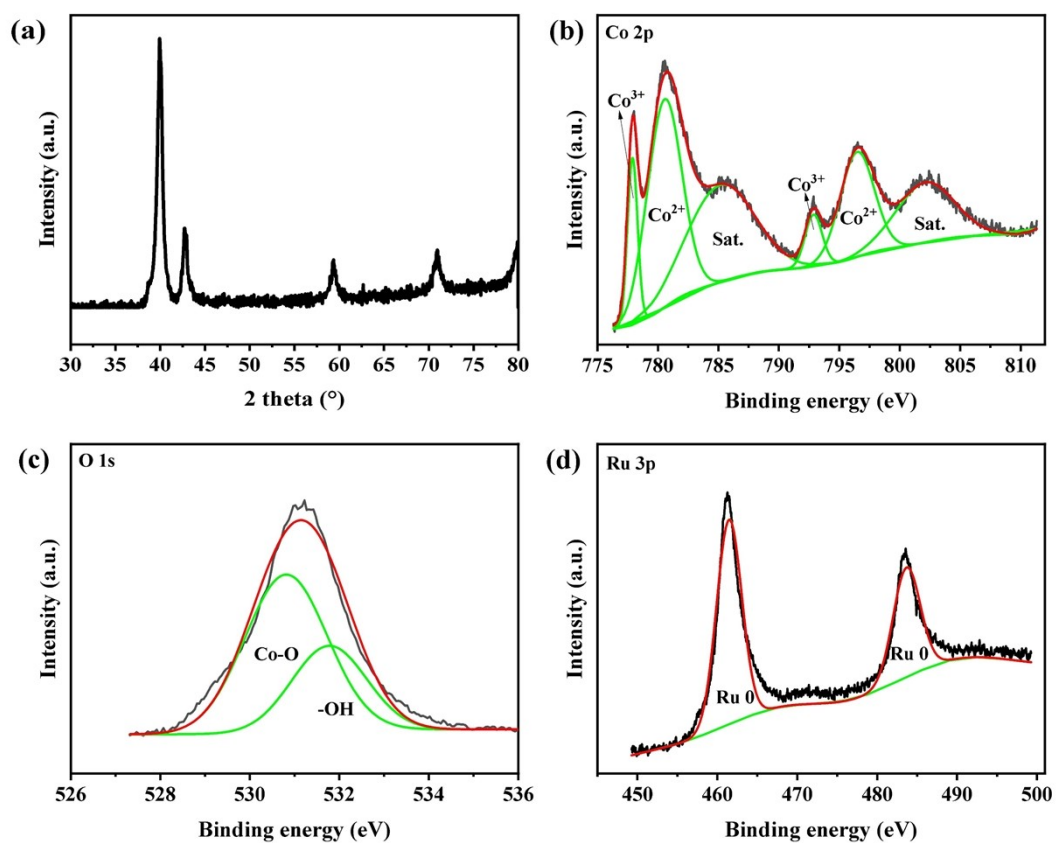

**Fig. S6.** CoO/Ru HPNs after long-term stability tests.

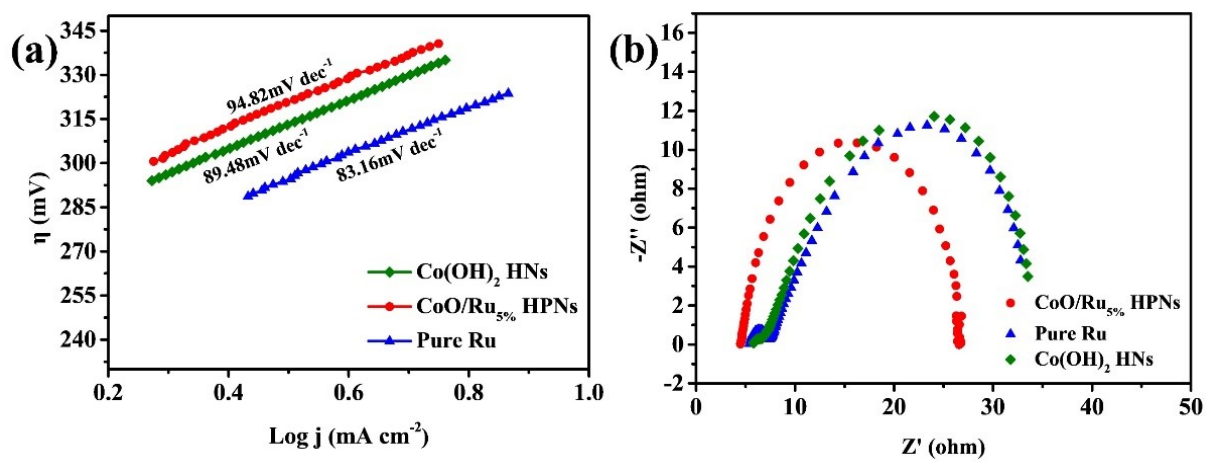

**Fig. S7.** (a) Tafel slope and (d) EIS curves of OER on CoO/Ru<sub>5%</sub> HPNs, Co(OH)<sub>2</sub> HNs and pure Ru.

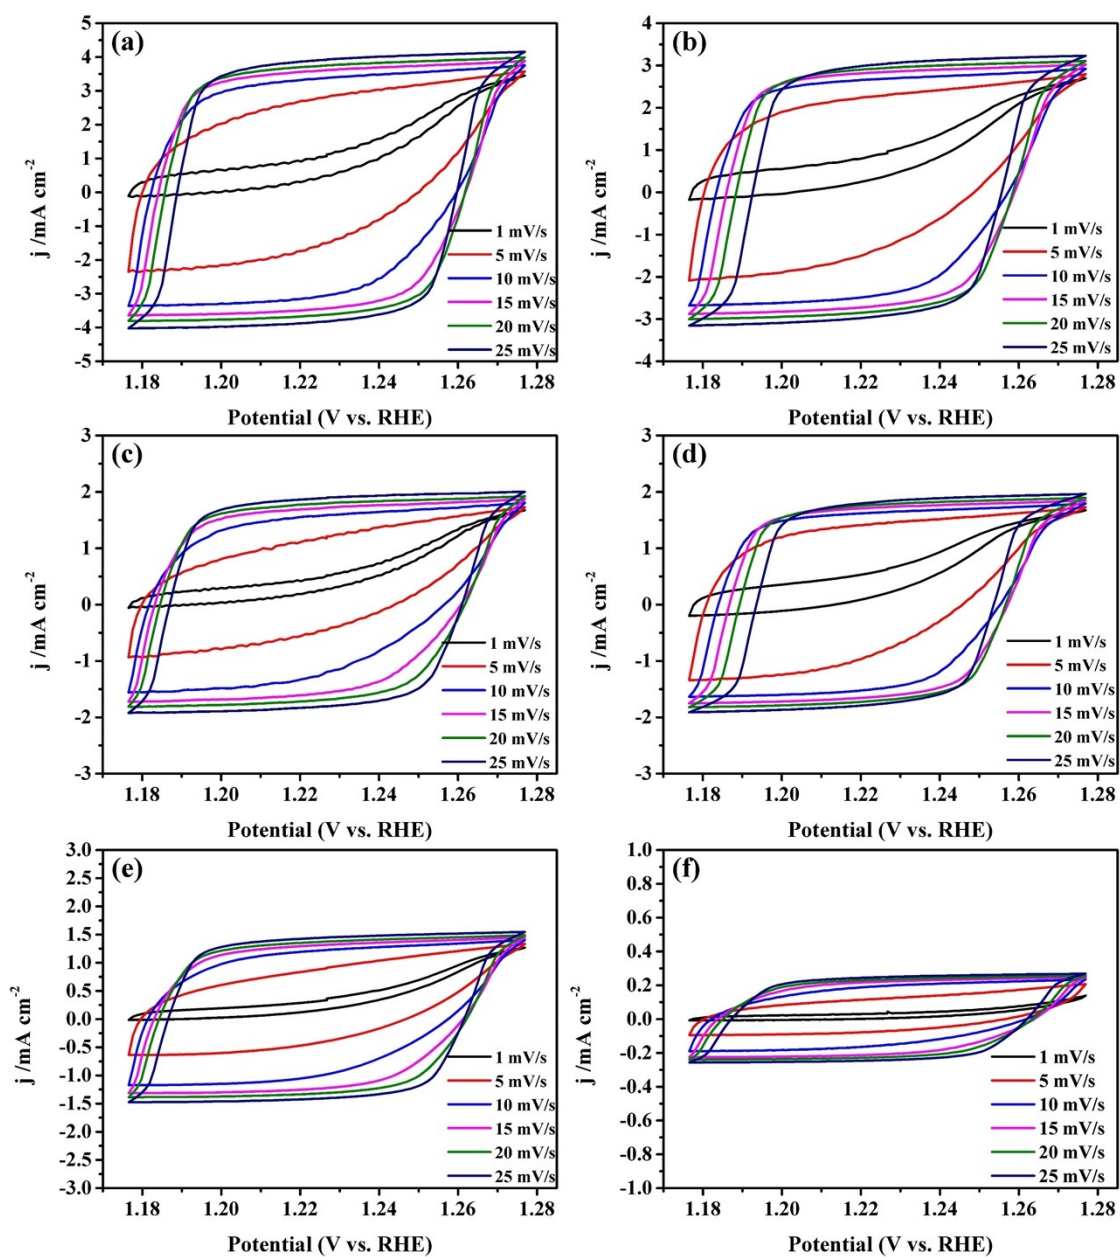

**Fig. S8.** CV curves for (a) CoO/Ru<sub>1.25%</sub> HPNs, (b) CoO HPNs, (c) Pure Ru, (d) Co(OH)<sub>2</sub> HNs, (e) CoO/Ru<sub>5%</sub> HPNs, (f) CoO nanoparticle at various scan rates from 1 to 25 mV/s.

**Table S1.** The fitting calculation results

| <b>Samples</b>               | <b><math>R_{\text{sol}}</math> (<math>\Omega</math>)</b> | <b><math>R_{\text{h}}</math> (<math>\Omega</math>)</b> | <b><math>R_{\text{ct}}</math> (<math>\Omega</math>)</b> |
|------------------------------|----------------------------------------------------------|--------------------------------------------------------|---------------------------------------------------------|
| CoO/Ru <sub>1.25%</sub> HPNs | 5.0                                                      | 0.2                                                    | 11.6                                                    |
| CoO HPNs                     | 5.4                                                      | 0.6                                                    | 23.7                                                    |
| Pure Ru                      | 5.8                                                      | 1.0                                                    | 27.7                                                    |
| Co(OH) <sub>2</sub> HNs      | 5.5                                                      | 1.8                                                    | 27.8                                                    |
| CoO/Ru <sub>5%</sub> HPNs    | 5.2                                                      | N/A                                                    | 25.3                                                    |
| CoO nanoparticle             | 5.1                                                      | 5.3                                                    | 36.6                                                    |
